# Supplementary material for: Comparative Transcriptome Analysis Reveals Different Low-Nitrogen-Responsive Genes in Pepper Cultivars
Source: MDPI journal article supplement (doi:10.3390/horticulturae7050110), 2021-05-13
Supplement: s1 [file s1]

## TCL1vs. TTL3

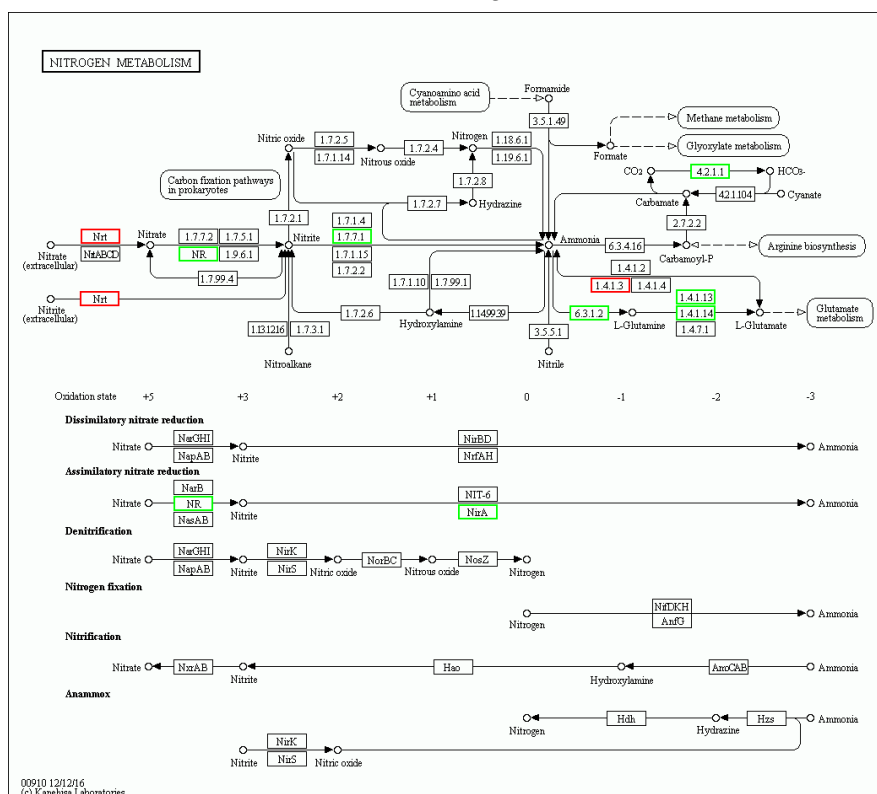

## TCR2 vs. TTR4

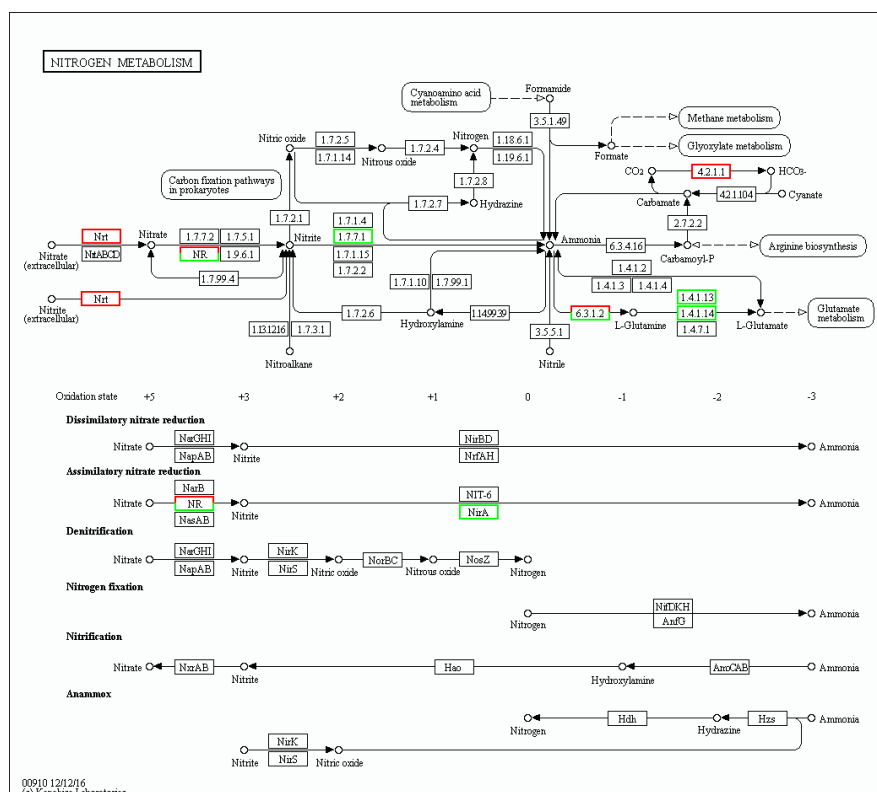

C

TCL5 vs. TTL7

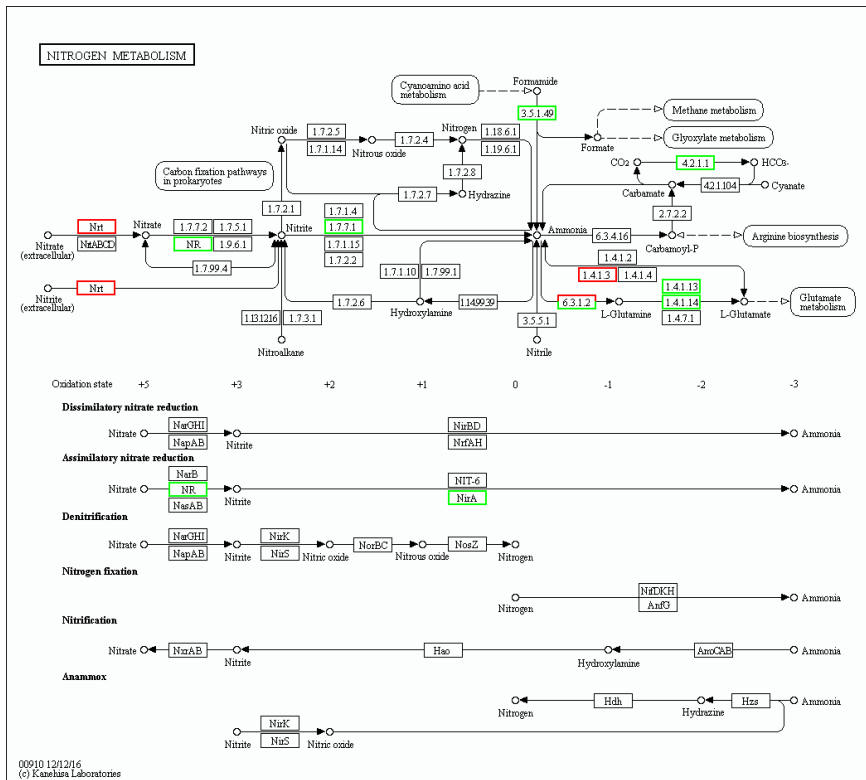

D

TCR6 vs. TTR8

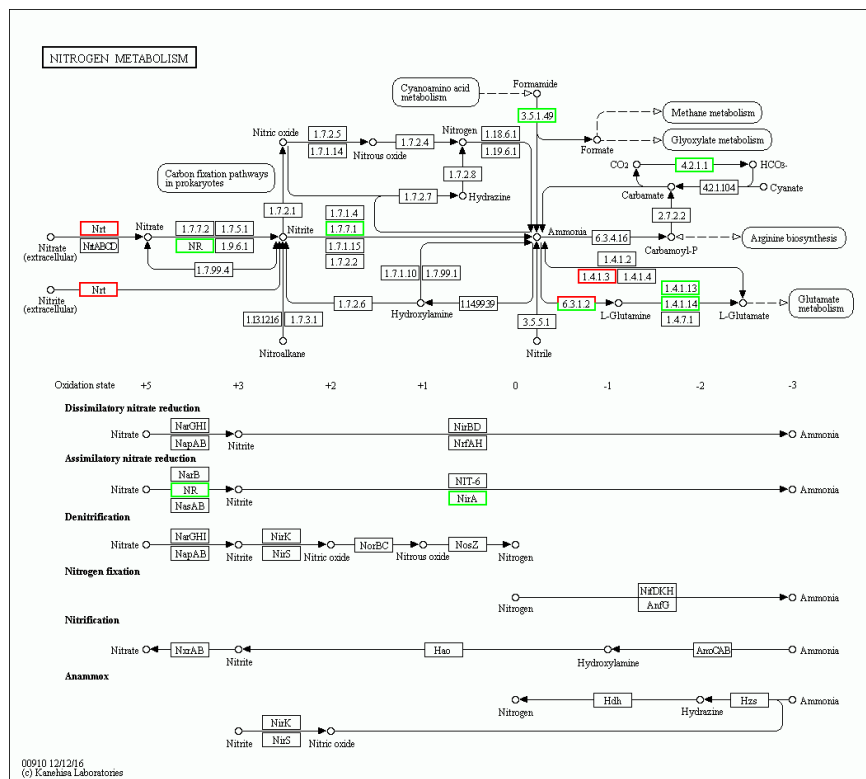

**Figure S1.** DEGs involved in nitrogen metabolism. **(A)** TCL1 vs. TTL3. **(B)** TCR2 vs. TTR4. **(C)** TCL5 vs. TTL7. **(D)** TCR6 vs. TTR8. Colours indicate the different gene expression, red: up-regulated, green: down-regulated.
