# Supplementary material for: Comparative Transcriptome Analysis Reveals Different Low-Nitrogen-Responsive Genes in Pepper Cultivars
Source: MDPI journal article supplement (doi:10.3390/horticulturae7050110), 2021-05-13
Supplement: s1 [file s1]

## **Supporting information**

### **Figure S1 DEGs involved in nitrogen metabolism**

**(A)** TCL1 vs. TTL3. **(B)** TCR2 vs. TTR4. **(C)** TCL5 vs. TTL7. **(D)** TCR6 vs. TTR8. The colors red and green represent up-regulated DEGs and down-regulated DEGs, respectively.

### **Table S1 Primers for qRT-PCR**

### **Table S2 Relative values of each character**

### **Table S3 DEGs of TCL1 vs. TTL3**

### **Table S4 DEGs of TCR2 vs. TTR4**

### **Table S5 DEGs of TCL5 vs. TTL7**

### **Table S6 DEGs of TCR6 vs. TTR8**
